# Supplementary material for: Automated Detection of Caffeinated Coffee-Induced Short-Term Effects on ECG Signals Using EMD, DWT, and WPD
Source: MDPI journal article supplement (doi:10.3390/nu14040885), 2022-02-19
Supplement: s1 [file s1]

**Supplementary Information:**
**1.EMD**

**Table S1.** Classification performance of the best ML models generated from the EMD-based processing of the ECG signals

| No. of IMFs | ML-model | Accuracy   | Precision   | Recall      | F-measure  | Sensitivity | Specificity | AUC         |
|-------------|----------|------------|-------------|-------------|------------|-------------|-------------|-------------|
| 1           | DT       | 50.00±3.40 | 50.00±6.24  | 28.89±4.21  | 36.57±4.82 | 28.89±4.21  | 71.11±4.21  | 0.529±0.070 |
|             | LR       | 51.39±1.96 | 50.72±1.01  | 98.89±1.52  | 67.05±1.05 | 98.89±1.52  | 3.89±3.73   | 0.527±0.086 |
|             | GLM      | 50.28±1.16 | 50.14±0.59  | 98.33±1.52  | 66.42±0.71 | 98.33±1.52  | 2.22±2.32   | 0.526±0.086 |
|             | NB       | 50.83±3.34 | 50.51±1.92  | 88.89±2.78  | 64.40±2.04 | 88.89±2.78  | 12.78±5.76  | 0.553±0.075 |
|             | RF       | 52.78±1.96 | 76.29±15.76 | 8.89±4.97   | 15.47±8.05 | 8.89±4.97   | 96.67±2.32  | 0.521±0.062 |
|             | GBT      | 50.00±2.20 | 50.00±1.36  | 80.56±5.20  | 61.66±2.14 | 80.56±5.20  | 19.44±5.20  | 0.517±0.046 |
|             | DL       | 56.11±2.11 | 54.08±1.59  | 82.22±2.48  | 65.21±0.89 | 82.22±2.48  | 30.00±6.02  | 0.615±0.055 |
|             | SVM      | 44.44±4.91 | 43.38±6.19  | 40.00±10.13 | 41.50±8.24 | 40.00±10.13 | 48.89±3.17  | 0.425±0.056 |
|             | FLM      | 54.72±2.32 | 0.572±0.047 | 52.74±1.30  | 90.56±4.21 | 60.65±2.02  | 90.56±4.21  | 0.572±0.047 |
| 2           | DT       | 46.94±3.60 | 48.07±2.42  | 71.67±5.34  | 57.44±2.11 | 71.67±5.34  | 22.22±10.02 | 0.469±0.036 |
|             | LR       | 53.06±5.05 | 52.73±4.38  | 59.44±5.76  | 55.85±4.80 | 59.44±5.76  | 46.67±6.33  | 0.537±0.065 |
|             | GLM      | 53.06±4.54 | 53.14±4.53  | 52.22±4.56  | 52.66±4.44 | 52.22±4.56  | 53.89±5.41  | 0.531±0.049 |
|             | NB       | 51.11±3.85 | 51.27±4.87  | 36.67±8.65  | 42.50±7.20 | 36.67±8.65  | 65.58±5.41  | 0.576±0.044 |
|             | RF       | 48.33±3.46 | 46.37±6.88  | 22.78±5.34  | 30.44±6.12 | 22.78±5.34  | 73.89±4.65  | 0.517±0.082 |
|             | GBT      | 53.61±2.52 | 52.77±1.91  | 67.78±7.24  | 59.25±3.64 | 67.78±7.24  | 39.44±5.34  | 0.579±0.019 |
|             | DL       | 51.11±1.16 | 50.67±0.70  | 82.78±3.62  | 62.85±1.54 | 82.78±3.62  | 19.44±1.96  | 0.550±0.028 |
|             | SVM      | 48.61±4.50 | 48.24±6.07  | 35.00±5.76  | 40.40±5.48 | 35.00±5.76  | 62.22±8.47  | 0.465±0.066 |
|             | FLM      | 51.67±1.81 | 57.32±7.53  | 13.33±2.32  | 21.58±3.40 | 13.33±2.32  | 90.00±2.48  | 0.596±0.061 |
| 3           | DT       | 49.44±0.76 | 40.00±0.00  | 2.22±1.24   | 4.21±0.00  | 2.22±1.24   | 96.67±2.32  | 0.458±0.040 |
|             | LR       | 51.94±1.58 | 51.43±1.15  | 70.00±3.62  | 59.27±1.78 | 70.00±3.62  | 33.89±3.62  | 0.522±0.016 |
|             | GLM      | 50.00±0.98 | 49.80±3.58  | 17.22±3.62  | 25.46±4.43 | 17.22±3.62  | 82.78±3.04  | 0.526±0.063 |
|             | NB       | 52.78±4.05 | 55.02±7.43  | 28.89±5.76  | 37.78±6.62 | 28.89±5.76  | 76.67±3.17  | 0.561±0.046 |
|             | RF       | 49.72±1.16 | 45.45±0.00  | 2.78±1.96   | -          | 2.78±1.96   | 96.67±3.04  | 0.589±0.055 |
|             | GBT      | 53.33±3.75 | 52.04±2.27  | 87.22±3.17  | 65.16±2.33 | 87.22±3.17  | 19.44±6.51  | 0.572±0.059 |
|             | DL       | 53.61±2.88 | 52.21±1.73  | 86.11±3.40  | 64.99±2.05 | 86.11±3.40  | 21.11±4.65  | 0.546±0.043 |
|             | SVM      | 53.06±1.52 | 52.08±1.11  | 78.33±4.97  | 62.49±1.36 | 78.33±4.97  | 27.78±6.80  | 0.554±0.065 |
|             | FLM      | 53.89±2.67 | 53.10±2.26  | 68.33±4.21  | 59.69±2.02 | 68.33±4.21  | 39.44±6.63  | 0.551±0.041 |
| 4           | DT       | 50.00±1.70 | 50.00±0.00  | 3.33±2.32   | 6.25±0.00  | 3.33±2.32   | 96.67±3.62  | 0.523±0.066 |
|             | LR       | 51.67±2.08 | 51.35±1.71  | 65.00±5.76  | 57.28±2.44 | 65.00±5.79  | 38.33±6.63  | 0.546±0.052 |
|             | GLM      | 48.89±2.85 | 49.04±2.36  | 58.89±6.33  | 53.44±3.68 | 58.89±6.33  | 38.89±5.20  | 0.530±0.030 |
|             | NB       | 58.06±3.32 | 59.54±3.64  | 50.00±5.89  | 54.28±4.63 | 50.00±5.89  | 66.11±3.62  | 0.596±0.056 |
|             | RF       | 48.61±1.39 | 49.29±0.71  | 96.11±1.52  | 65.16±0.95 | 96.11±1.52  | 1.11±1.52   | 0.472±0.053 |
|             | GBT      | 50.56±3.20 | 50.16±3.44  | 46.11±11.88 | 47.67±7.93 | 46.11±11.88 | 55.00±6.92  | 0.529±0.039 |
|             | DL       | 57.50±2.32 | 57.12±2.08  | 60.00±4.65  | 58.48±3.01 | 60.00±4.65  | 55.00±3.04  | 0.587±0.047 |
|             | SVM      | 46.11±1.16 | 47.19±0.89  | 65.56±4.65  | 54.83±2.02 | 65.56±4.65  | 26.67±4.21  | 0.437±0.035 |
|             | FLM      | 50.00±0.00 | 48.67±36.64 | 3.33±3.04   | 6.25±0.00  | 3.33±3.04   | 96.67±2.32  | 0.451±0.046 |
| 5           | DT       | NA         | -           | -           | -          | -           | -           | -           |
|             | LR       | 51.67±3.73 | 51.11±2.35  | 82.78±3.62  | 63.15±2.15 | 82.78±3.61  | 20.56±8.00  | 0.555±0.049 |
|             | GLM      | 52.22±0.76 | 51.57±0.59  | 73.89±7.51  | 60.62±2.34 | 73.89±7.51  | 30.58±7.61  | 0.560±0.040 |

|   |     |            |             |            |            |            |            |             |
|---|-----|------------|-------------|------------|------------|------------|------------|-------------|
| 6 | NB  | 52.22±4.00 | 51.59±2.86  | 74.44±3.04 | 60.93±2.82 | 74.44±3.04 | 30.00±6.02 | 0.564±0.072 |
|   | RF  | NA         | -           | -          | -          | -          | -          | -           |
|   | GBT | 52.50±1.81 | 53.82±2.66  | 34.44±7.51 | 41.68±5.98 | 34.44±7.51 | 70.56±5.76 | 0.526±0.047 |
|   | DL  | 53.06±2.06 | 52.10±1.39  | 76.11±3.17 | 61.84±1.75 | 76.11±3.17 | 30.00±3.62 | 0.565±0.050 |
|   | SVM | 48.33±3.73 | 48.22±3.90  | 47.78±6.63 | 47.92±5.03 | 47.78±6.63 | 48.89±5.05 | 0.491±0.043 |
|   | FLM | 48.61±4.71 | 49.16±2.76  | 83.33±6.21 | 61.82±3.81 | 83.33±6.21 | 13.89±4.81 | 0.485±0.077 |
|   | DT  | 49.44±2.32 | 49.71±1.20  | 97.22±3.40 | 65.78±1.82 | 97.22±3.40 | 1.67±1.52  | 0.492±0.032 |
|   | LR  | 52.50±3.01 | 52.07±2.64  | 60.00±7.51 | 55.66±4.53 | 60.00±7.51 | 45.00±4.12 | 0.530±0.043 |
|   | GLM | 48.61±4.91 | 47.92±7.06  | 33.89±7.45 | 39.55±7.02 | 33.89±7.45 | 63.33±6.63 | 0.494±0.071 |
| 6 | NB  | 51.94±1.58 | 52.68±2.11  | 37.78±2.48 | 43.99±2.37 | 37.78±2.48 | 66.11±1.24 | 0.513±0.048 |
|   | RF  | 48.33±1.16 | 49.1±0.61   | 95.56±2.48 | 64.90±1.06 | 95.56±2.48 | 1.11±1.52  | 0.473±0.055 |
|   | GBT | 51.94±1.86 | 53.58±3.47  | 26.11±6.39 | 34.87±6.70 | 26.11±6.39 | 77.78±3.40 | 0.538±0.32  |
|   | DL  | 53.61±1.24 | 52.73±1.04  | 71.76±5.34 | 60.66±1.17 | 71.67±5.34 | 35.56±7.71 | 0.554±0.024 |
|   | SVM | 53.61±0.76 | 53.70±0.90  | 52.78±3.93 | 53.16±1.93 | 52.78±3.94 | 54.44±4.21 | 0.515±0.042 |
|   | FLM | 48.33±3.01 | 30.00±32.60 | 2.78±3.40  | 5.10±0.00  | 2.78±3.40  | 93.89±3.04 | 0.480±0.101 |

## 2. DWT

**Table S2.** Classification performance of the best ML models generated from the DWT-based processing of the ECG signals at a decomposition level of 2.

| Wavelet | ML-model | Level-2    |             |            |            |             |             |             |
|---------|----------|------------|-------------|------------|------------|-------------|-------------|-------------|
|         |          | Accuracy   | Precision   | Recall     | F-measure  | Sensitivity | Specificity | AUC         |
| Db2     | DT       | 56.11±1.58 | 69.85±10.76 | 23.33±3.73 | 34.55±3.36 | 23.33±3.73  | 88.89±5.89  | 0.608±0.053 |
|         | LR       | 65.28±3.40 | 80.65±4.25  | 40.00±5.76 | 53.38±5.98 | 40.00±5.76  | 90.56±1.52  | 0.706±0.031 |
|         | GLM      | 57.22±2.06 | 83.47±11.78 | 18.33±3.17 | 29.02±4.36 | 18.33±3.17  | 96.11±3.17  | 0.684±0.055 |
|         | NB       | 60.28±4.67 | 67.35±8.69  | 40.56±4.21 | 50.55±5.26 | 40.56±4.21  | 80.00±6.33  | 0.623±0.031 |
|         | RF       | 57.22±4.21 | 70.56±13.92 | 25.56±4.97 | 37.33±6.47 | 25.56±4.97  | 88.89±5.56  | 0.621±0.070 |
|         | GBT      | 75.28±0.62 | 88.55±3.90  | 58.33±3.40 | 70.20±1.31 | 58.33±3.40  | 92.22±3.62  | 0.830±0.020 |
|         | DL       | 64.72±3.34 | 68.01±5.18  | 56.11±4.97 | 61.36±3.82 | 56.11±4.97  | 73.33±5.76  | 0.719±0.010 |
|         | SVM      | 56.11±4.46 | 56.68±4.59  | 52.22±6.33 | 54.25±5.03 | 52.22±6.33  | 60.00±6.39  | 0.589±0.053 |
|         | FLM      | 54.17±3.11 | 52.72±2.03  | 81.11±3.62 | 63.89±2.37 | 81.11±3.62  | 27.22±4.56  | 0.546±0.046 |
| Db4     | DT       | 56.11±2.11 | 76.39±12.34 | 20.00±4.97 | 30.98±4.71 | 20.00±4.97  | 92.22±8.19  | 0.561±0.023 |
|         | LR       | 64.44±4.67 | 82.33±12.08 | 37.78±6.69 | 51.35±6.86 | 37.78±6.69  | 91.11±6.92  | 0.685±0.068 |
|         | GLM      | 64.44±3.20 | 71.96±6.14  | 47.78±3.62 | 57.33±3.69 | 47.78±3.62  | 81.11±5.34  | 0.682±0.045 |
|         | NB       | 56.39±2.11 | 63.79±4.70  | 30.00±4.97 | 40.57±4.93 | 30.00±4.97  | 82.78±4.56  | 0.616±0.076 |
|         | RF       | 58.61±3.01 | 68.88±8.29  | 32.22±1.52 | 43.82±2.62 | 32.22±1.52  | 85.00±5.41  | 0.628±0.040 |
|         | GBT      | 70.00±2.11 | 67.00±2.98  | 79.44±4.21 | 72.59±1.50 | 79.44±4.21  | 60.58±6.63  | 0.794±0.009 |
|         | DL       | 65.00±2.06 | 64.51±1.74  | 66.67±3.93 | 65.54±2.52 | 66.67±3.93  | 63.33±2.32  | 0.734±0.065 |
|         | SVM      | 59.17±1.58 | 57.69±1.39  | 68.89±2.32 | 62.78±1.42 | 68.68±2.32  | 49.44±3.04  | 0.597±0.044 |
|         | FLM      | NA         | -           | -          | -          | -           | -           | -           |
| Db6     | DT       | 54.44±2.67 | 62.73±7.23  | 20.56±6.09 | 30.77±7.81 | 20.56±6.09  | 88.33±1.24  | 0.587±0.026 |
|         | LR       | 60.00±1.16 | 60.62±1.43  | 57.22±3.17 | 58.83±1.75 | 57.22±3.17  | 62.78±3.17  | 0.652±0.041 |
|         | GLM      | 59.72±0.98 | 60.38±1.09  | 56.67±3.73 | 58.41±1.99 | 56.67±3.73  | 62.78±3.17  | 0.651±0.041 |
|         | NB       | 53.61±4.87 | 53.00±3.97  | 67.22±4.97 | 59.18±3.61 | 67.22±4.97  | 40.00±9.34  | 0.571±0.041 |

|     |     |            |            |            |            |            |             |             |
|-----|-----|------------|------------|------------|------------|------------|-------------|-------------|
|     | RF  | 55.83±2.48 | 60.55±3.95 | 33.33±5.56 | 42.82±5.38 | 33.33±5.56 | 78.33±3.62  | 0.610±0.049 |
|     | GBT | 78.33±0.76 | 75.89±2.01 | 83.33±5.20 | 79.31±1.53 | 83.33±5.20 | 73.33±4.21  | 0.866±0.029 |
|     | DL  | 70.83±2.60 | 68.98±2.89 | 76.11±5.76 | 72.24±2.76 | 76.11±5.76 | 65.56±5.76  | 0.808±0.039 |
|     | SVM | 47.78±2.32 | 47.54±2.60 | 44.44±6.51 | 45.82±4.21 | 44.44±6.51 | 51.11±5.05  | 0.484±0.019 |
|     | FLM | 49.72±2.67 | 49.46±3.87 | 32.78±6.33 | 39.24±5.44 | 32.78±6.33 | 66.67±5.20  | 0.484±0.065 |
| Db8 | DT  | 51.39±0.00 | 100.00±0.0 | 2.78±0.00  | 5.41±0.00  | 2.78±0.00  | 100.00±0.00 | 0.514±0.00  |
|     | LR  | 62.78±3.32 | 74.64±9.64 | 40.00±3.17 | 51.81±2.92 | 40.00±3.17 | 85.56±7.45  | 0.656±0.064 |
|     | GLM | 67.50±3.04 | 79.71±6.07 | 47.22±5.56 | 59.11±4.86 | 47.22±5.56 | 87.78±4.21  | 0.702±0.046 |
|     | NB  | 57.78±3.20 | 56.96±3.21 | 65.00±2.48 | 60.65±1.93 | 65.00±2.48 | 50.56±7.19  | 0.564±0.067 |
|     | RF  | 52.78±2.60 | 51.52±1.42 | 95.00±2.32 | 66.80±1.68 | 95.00±2.32 | 10.56±3.62  | 0.543±0.061 |
|     | GBT | 73.61±0.98 | 74.61±3.04 | 72.22±7.08 | 73.11±2.55 | 72.22±7.08 | 75.00±6.21  | 0.807±0.017 |
|     | DL  | 67.78±2.28 | 70.82±2.04 | 60.56±6.33 | 65.14±3.78 | 60.56±6.33 | 75.00±3.40  | 0.750±0.032 |
|     | SVM | 59.44±3.46 | 57.85±3.02 | 70.00±3.04 | 63.33±2.83 | 70.00±3.04 | 48.89±5.05  | 0.609±0.069 |
|     | FLM | 53.06±3.73 | 51.89±2.27 | 83.89±5.34 | 64.09±3.04 | 83.89±5.34 | 22.22±5.20  | 0.570±0.048 |

**Table S3.** Classification performance of the best ML models generated from the DWT-based processing of the ECG signals at a decomposition level of 3.

| Wavelet | ML-model | Level-3    |             |            |            |             |             |             |
|---------|----------|------------|-------------|------------|------------|-------------|-------------|-------------|
|         |          | Accuracy   | Precision   | Recall     | F-measure  | Sensitivity | Specificity | AUC         |
| Db2     | DT       | NA         | -           | -          | -          | -           | -           | -           |
|         | LR       | 65.28±2.20 | 77.26±3.79  | 43.33±3.17 | 55.48±3.24 | 43.33±3.17  | 87.22±2.48  | 0.703±0.057 |
|         | GLM      | 66.11±4.00 | 80.84±6.41  | 42.22±6.02 | 55.33±6.38 | 42.22±6.02  | 90.00±3.73  | 0.676±0.061 |
|         | NB       | 61.11±3.67 | 65.40±4.77  | 47.22±6.51 | 54.70±5.24 | 47.22±6.51  | 75.00±4.39  | 0.626±0.052 |
|         | RF       | 50.83±1.24 | 55.83±8.12  | 10.00±3.73 | 16.66±5.36 | 10.00±3.73  | 91.67±3.93  | 0.574±0.029 |
|         | GBT      | 72.50±3.73 | 77.44±2.19  | 63.33±7.71 | 69.54±5.29 | 63.33±7.71  | 81.67±1.52  | 0.810±0.048 |
|         | DL       | 60.00±2.48 | 69.87±5.74  | 35.56±3.62 | 47.00±3.69 | 35.56±3.62  | 84.44±4.21  | 0.687±0.024 |
|         | SVM      | 53.33±2.11 | 54.37±2.89  | 42.22±2.32 | 47.49±2.05 | 42.22±2.32  | 64.44±4.12  | 0.542±0.028 |
|         | FLM      | 56.67±1.81 | 54.89±1.44  | 75.56±4.97 | 63.51±1.74 | 75.56±4.97  | 37.78±6.39  | 0.573±0.031 |
| Db4     | DT       | 55.28±1.81 | 87.14±13.84 | 12.78±3.17 | 22.11±4.91 | 12.78±3.17  | 97.78±2.32  | 0.596±0.016 |
|         | LR       | 62.22±3.01 | 72.32±4.06  | 39.44±7.45 | 50.76±6.87 | 39.44±7.45  | 85.00±3.17  | 0.623±0.056 |
|         | GLM      | 67.78±4.21 | 76.34±7.79  | 52.22±2.32 | 61.92±3.78 | 52.22±2.32  | 83.33±7.08  | 0.691±0.038 |
|         | NB       | 60.83±3.32 | 0.602±0.065 | 66.44±6.15 | 44.44±5.56 | 53.05±4.68  | 44.44±5.56  | 77.22±6.02  |
|         | RF       | 50.56±2.52 | 50.42±1.86  | 69.44±3.93 | 58.39±2.23 | 69.44±3.93  | 31.67±4.65  | 0.548±0.026 |
|         | GBT      | 76.94±3.20 | 79.91±4.60  | 72.22±2.78 | 75.83±3.04 | 72.22±2.78  | 81.67±5.05  | 0.850±0.041 |
|         | DL       | 65.28±4.61 | 72.02±7.71  | 50.56±4.97 | 59.28±5.11 | 50.56±4.93  | 80.00±6.63  | 0.725±0.051 |
|         | SVM      | 64.17±2.48 | 67.22±3.55  | 55.56±1.96 | 60.81±2.27 | 55.58±1.96  | 72.78±4.12  | 0.682±0.021 |
|         | FLM      | 53.61±1.58 | 52.26±1.05  | 83.89±3.62 | 64.38±1.39 | 83.89±3.62  | 23.33±4.21  | 0.562±0.042 |
| Db6     | DT       | 52.22±1.58 | 51.16±0.83  | 97.78±2.32 | 67.17±1.22 | 97.78±2.32  | 6.67±1.52   | 0.532±0.062 |
|         | LR       | 63.89±2.60 | 72.27±6.72  | 46.11±4.21 | 56.03±3.01 | 46.11±4.21  | 81.67±6.69  | 0.707±0.034 |
|         | GLM      | 65.00±1.81 | 86.55±4.59  | 35.56±2.32 | 50.38±2.81 | 35.56±2.32  | 94.44±1.96  | 0.663±0.038 |
|         | NB       | 56.94±1.70 | 61.52±4.32  | 38.33±5.34 | 46.94±3.33 | 38.33±5.34  | 75.56±6.63  | 0.571±0.026 |
|         | RF       | 50.28±1.16 | 50.14±0.61  | 97.78±2.32 | 66.29±0.85 | 97.78±2.32  | 2.78±2.78   | 0.459±0.039 |
|         | GBT      | 75.83±3.49 | 75.18±5.09  | 77.78±3.93 | 76.33±2.90 | 77.78±3.93  | 73.89±7.24  | 0.839±0.033 |
|         | DL       | 64.17±3.17 | 71.02±3.53  | 47.78±6.02 | 57.01±4.90 | 47.78±6.02  | 80.56±2.78  | 0.726±0.010 |
|         | SVM      | 58.89±3.20 | 59.28±4.03  | 58.89±4.56 | 58.88±1.94 | 58.89±4.56  | 58.89±9.50  | 0.629±0.037 |
|         | FLM      | 40.17±1.58 | 28.57±0.00  | 1.11±1.52  | 2.14±0.00  | -           | 97.22±2.78  | 0.534±0.040 |
| Db8     | DT       | NA         | -           | -          | -          | -           | -           | -           |

|  |     |            |            |            |            |            |            |             |
|--|-----|------------|------------|------------|------------|------------|------------|-------------|
|  | LR  | 58.61±2.28 | 66.08±5.67 | 36.11±1.96 | 46.60±1.95 | 36.11±1.96 | 81.11±4.97 | 0.623±0.037 |
|  | GLM | 60.56±0.76 | 78.57±4.37 | 29.44±4.21 | 42.59±3.72 | 29.44±4.21 | 91.67±3.40 | 0.680±0.036 |
|  | NB  | 59.17±2.88 | 58.81±2.68 | 61.11±4.39 | 59.91±3.26 | 61.11±4.39 | 57.22±3.17 | 0.592±0.041 |
|  | RF  | 50.00±2.95 | 50.06±2.91 | 52.78±2.78 | 51.36±2.49 | 52.78±2.78 | 47.22±4.81 | 0.533±0.025 |
|  | GBT | 73.06±2.11 | 87.62±3.76 | 53.89±5.05 | 66.56±3.62 | 53.89±5.05 | 92.22±3.04 | 0.817±0.030 |
|  | DL  | 64.72±2.11 | 87.68±4.08 | 34.44±5.41 | 49.20±5.34 | 34.44±5.41 | 95.00±2.32 | 0.769±0.037 |
|  | SVM | 53.06±1.16 | 53.77±1.07 | 44.44±3.40 | 48.58±1.81 | 44.44±3.40 | 61.67±4.56 | 0.550±0.036 |
|  | FLM | 54.72±3.75 | 54.00±3.48 | 66.11±2.32 | 59.39±2.36 | 66.11±2.32 | 43.33±7.51 | 0.564±0.049 |

**Table S4.** Classification performance of the best ML models generated from the DWT-based processing of the ECG signals at a decomposition level of 4.

| Wavelet | ML-model | Level-4    |             |            |            |             |             |             |
|---------|----------|------------|-------------|------------|------------|-------------|-------------|-------------|
|         |          | Accuracy   | Precision   | Recall     | F-measure  | Sensitivity | Specificity | AUC         |
| Db2     | DT       | NA         | -           | -          | -          | -           | -           | -           |
|         | LR       | 66.94±5.33 | 75.67±7.40  | 50.00±7.08 | 60.09±6.86 | 50.00±7.08  | 83.89±5.34  | 0.700±0.067 |
|         | GLM      | 64.44±2.71 | 80.93±8.37  | 38.33±3.04 | 51.87±3.31 | 38.33±3.04  | 90.56±5.05  | 0.699±0.063 |
|         | NB       | 59.17±3.62 | 63.39±6.01  | 43.89±4.97 | 51.74±4.73 | 43.89±4.97  | 74.44±5.69  | 0.627±0.034 |
|         | RF       | 58.06±2.06 | 75.83±8.13  | 23.89±3.17 | 36.22±3.96 | 23.89±3.17  | 92.22±3.04  | 0.602±0.060 |
|         | GBT      | 72.50±3.73 | 77.44±2.19  | 63.33±7.71 | 69.54±5.29 | 63.33±7.71  | 81.67±1.52  | 0.810±0.048 |
|         | DL       | 60.00±2.48 | 69.87±5.74  | 35.56±3.62 | 47.00±3.69 | 35.56±3.62  | 84.44±4.21  | 0.687±0.024 |
|         | SVM      | 63.61±3.60 | 65.61±3.67  | 57.22±6.97 | 60.98±5.04 | 57.22±6.97  | 70.00±4.97  | 0.683±0.053 |
| Db4     | FLM      | 56.67±1.16 | 54.45±0.72  | 81.67±5.41 | 65.28±1.98 | 81.67±5.41  | 31.67±5.41  | 0.589±0.020 |
|         | DT       | NA         | -           | -          | -          | -           | -           | -           |
|         | LR       | 60.00±3.32 | 65.44±4.32  | 42.22±7.19 | 51.11±6.18 | 42.22±7.19  | 77.78±3.93  | 0.632±0.042 |
|         | GLM      | 53.33±2.11 | 65.24±8.09  | 14.44±4.56 | 23.38±6.42 | 14.44±4.56  | 92.22±3.62  | 0.650±0.095 |
|         | NB       | 58.89±2.11 | 62.29±2.65  | 45.00±3.62 | 52.21±3.13 | 45.00±3.62  | 72.78±2.32  | 0.605±0.033 |
|         | RF       | 48.61±3.26 | 48.31±3.64  | 44.44±7.61 | 46.15±5.65 | 44.44±7.61  | 52.78±5.56  | 0.540±0.050 |
|         | GBT      | 72.50±3.85 | 82.28±6.84  | 57.78±5.34 | 67.71±4.67 | 57.78±5.34  | 87.22±6.09  | 0.817±0.053 |
|         | DL       | 62.50±2.78 | 81.09±4.87  | 32.78±6.33 | 46.36±6.58 | 32.78±6.33  | 92.22±3.04  | 0.715±0.041 |
| Db6     | SVM      | 59.44±3.73 | 61.86±4.83  | 49.44±3.62 | 54.94±4.01 | 49.44±3.62  | 69.44±4.39  | 0.607±0.016 |
|         | FLM      | 51.39±3.80 | 50.94±2.90  | 65.56±8.24 | 57.26±4.94 | 65.56±8.24  | 37.22±3.17  | 0.528±0.042 |
|         | DT       | 56.11±4.46 | 66.54±10.62 | 25.56±8.43 | 36.26±9.75 | 25.56±8.43  | 86.67±6.63  | 0.591±0.067 |
|         | LR       | 61.67±4.12 | 59.25±2.86  | 73.89±9.74 | 65.64±5.29 | 73.89±9.74  | 49.44±4.56  | 0.701±0.707 |
|         | GLM      | 57.78±2.32 | 78.02±8.56  | 21.67±3.04 | 33.87±4.34 | 21.67±3.04  | 93.89±2.32  | 0.683±0.053 |
|         | NB       | 59.17±2.11 | 55.88±1.55  | 87.78±2.48 | 68.26±1.08 | 87.78±2.48  | 30.56±5.56  | 0.611±0.037 |
|         | RF       | 50.83±1.58 | 52.34±7.82  | 11.11±5.56 | 18.00±7.98 | 11.11±5.56  | 90.56±3.17  | 0.606±0.058 |
|         | GBT      | 69.72±3.85 | 72.54±4.77  | 63.89±8.56 | 67.65±5.33 | 63.89±8.56  | 75.56±6.33  | 0.778±0.034 |
| Db8     | DL       | 62.22±6.09 | 63.48±6.43  | 57.22±7.51 | 60.15±6.90 | 57.22±7.51  | 67.22±5.34  | 0.680±0.036 |
|         | SVM      | 53.33±3.75 | 52.92±3.19  | 63.33±5.34 | 57.54±3.06 | 63.33±5.34  | 43.33±8.47  | 0.528±0.051 |
|         | FLM      | 51.67±4.33 | 52.22±6.34  | 38.33±7.19 | 44.04±6.49 | 38.33±7.19  | 65.00±6.09  | 0.522±0.049 |
|         | DT       | NA         | -           | -          | -          | -           | -           | -           |
|         | LR       | 53.61±2.32 | 65.67±9.40  | 13.89±5.56 | 22.68±8.23 | 13.89±5.56  | 93.33±1.52  | 0.620±0.069 |
|         | GLM      | 55.56±1.39 | 61.81±6.44  | 31.67±5.76 | 41.32±4.56 | 31.67±5.76  | 79.44±7.24  | 0.639±0.052 |
|         | NB       | 56.67±5.93 | 60.20±9.34  | 41.11±3.62 | 48.81±5.60 | 41.11±3.62  | 72.22±8.33  | 0.600±0.050 |
|         | RF       | NA         | -           | -          | -          | -           | -           | -           |

|  |     |            |             |            |            |            |            |             |
|--|-----|------------|-------------|------------|------------|------------|------------|-------------|
|  | GBT | 61.39±1.81 | 58.95±1.75  | 75.56±5.34 | 66.14±1.91 | 75.56±5.34 | 47.22±6.51 | 0.650±0.049 |
|  | DL  | 64.44±3.34 | 64.38±3.66  | 65.00±4.65 | 64.62±3.35 | 65.00±4.65 | 63.89±5.20 | 0.695±0.051 |
|  | SVM | 56.11±1.56 | 66.32±4.44  | 25.00±1.96 | 36.27±2.44 | 25.00±1.96 | 87.22±2.48 | 0.606±0.044 |
|  | FLM | 50.00±3.40 | 49.83±12.51 | 12.78±4.21 | 20.25±6.25 | 12.78±4.21 | 87.22±4.21 | 0.569±0.067 |

**Table S5.** Classification performance of the best ML models generated from the DWT-based processing of the ECG signals at a decomposition level of 5.

| Wavelet | ML-model | Level-5    |             |            |            |             |             |             |
|---------|----------|------------|-------------|------------|------------|-------------|-------------|-------------|
|         |          | Accuracy   | Precision   | Recall     | F-measure  | Sensitivity | Specificity | AUC         |
| Db2     | DT       | 53.61±1.24 | 87.00±18.57 | 10.00±4.21 | 17.40±5.90 | 10.00±4.21  | 97.22±4.81  | 0.554±0.020 |
|         | LR       | 60.00±2.67 | 57.90±1.89  | 73.33±6.39 | 64.63±3.13 | 73.33±6.39  | 46.67±4.97  | 0.643±0.020 |
|         | GLM      | 58.33±4.39 | 60.58±6.23  | 48.89±3.73 | 54.02±4.11 | 48.89±3.73  | 67.78±7.24  | 0.641±0.047 |
|         | NB       | 56.67±3.01 | 58.42±3.75  | 46.11±4.65 | 51.49±4.13 | 46.11±4.65  | 67.22±3.62  | 0.638±0.038 |
|         | RF       | 51.94±2.71 | 51.03±1.44  | 96.11±3.17 | 66.66±1.98 | 96.11±3.17  | 7.78±2.32   | 0.617±0.062 |
|         | GBT      | 70.00±1.58 | 71.65±3.40  | 66.67±3.40 | 68.96±1.24 | 66.67±3.40  | 73.33±5.41  | 0.771±0.032 |
|         | DL       | 64.17±1.52 | 62.60±2.46  | 71.11±4.21 | 66.47±1.08 | 71.11±4.21  | 57.22±6.39  | 0.682±0.027 |
|         | SVM      | 55.66±3.11 | 53.90±2.15  | 76.67±6.97 | 63.22±3.35 | 76.67±6.97  | 34.44±6.09  | 0.573±0.050 |
|         | FLM      | 56.39±3.20 | 54.40±2.32  | 80.00±2.32 | 64.74±2.08 | 80.00±2.32  | 32.78±5.69  | 0.595±0.025 |
| Db4     | DT       | 49.44±3.62 | 47.25±11.22 | 17.22±6.63 | 25.08±8.60 | 17.22±6.63  | 81.67±3.17  | 0.475±0.058 |
|         | LR       | 58.33±2.60 | 67.73±6.20  | 32.22±4.21 | 43.52±4.34 | 32.22±4.21  | 84.44±4.21  | 0.660±0.039 |
|         | GLM      | 61.11±2.60 | 71.12±3.83  | 37.22±4.65 | 48.80±4.78 | 37.22±4.65  | 85.00±1.52  | 0.658±0.044 |
|         | NB       | 58.33±4.91 | 56.62±3.77  | 70.00±8.19 | 62.56±5.50 | 70.00±8.19  | 46.67±3.04  | 0.602±0.052 |
|         | RF       | 61.94±2.52 | 64.74±3.24  | 52.78±4.39 | 58.05±3.16 | 52.78±4.39  | 71.11±4.65  | 0.660±0.060 |
|         | GBT      | 71.11±0.62 | 74.18±2.16  | 65.00±3.17 | 69.21±1.05 | 65.00±3.17  | 77.22±3.62  | 0.773±0.023 |
|         | DL       | 65.56±2.67 | 69.57±3.33  | 55.56±5.89 | 61.62±4.00 | 55.56±5.89  | 75.56±4.97  | 0.694±0.040 |
|         | SVM      | 59.72±2.78 | 58.95±2.76  | 64.44±2.32 | 61.55±2.24 | 64.44±2.32  | 55.00±4.56  | 0.628±0.047 |
|         | FLM      | 56.11±4.46 | 57.74±5.56  | 46.11±5.76 | 51.17±5.26 | 46.11±5.76  | 66.11±6.33  | 0.598±0.037 |
| Db6     | DT       | 50.28±1.52 | 50.14±0.78  | 07.22±1.96 | 66.16±1.04 | 07.22±1.96  | 3.33±2.32   | 0.530±0.053 |
|         | LR       | 61.94±3.34 | 73.80±8.54  | 37.78±5.05 | 49.72±4.90 | 37.78±5.05  | 86.11±5.56  | 0.700±0.056 |
|         | GLM      | 60.83±1.81 | 66.77±2.79  | 43.33±4.65 | 52.42±3.64 | 43.33±4.65  | 78.33±3.62  | 0.642±0.030 |
|         | NB       | 57.78±2.71 | 60.91±4.35  | 44.44±1.96 | 51.30±1.79 | 44.44±1.96  | 71.11±6.09  | 0.643±0.062 |
|         | RF       | 57.50±1.24 | 61.57±1.41  | 40.00±5.05 | 48.34±3.74 | 40.00±5.05  | 75.00±3.40  | 0.584±0.036 |
|         | GBT      | 68.89±3.04 | 69.09±2.53  | 68.33±6.69 | 68.60±4.09 | 68.33±6.69  | 69.44±3.40  | 0.776±0.041 |
|         | DL       | 65.56±3.01 | 65.50±2.13  | 65.56±7.51 | 65.40±4.32 | 65.56±7.51  | 65.56±3.17  | 0.721±0.019 |
|         | SVM      | 61.39±2.28 | 61.32±1.96  | 61.67±4.97 | 61.43±3.03 | 61.67±4.97  | 61.11±3.40  | 0.641±0.038 |
|         | FLM      | 58.33±2.78 | 56.44±2.04  | 72.78±5.34 | 63.54±3.14 | 72.78±5.34  | 43.89±3.62  | 0.610±0.022 |
| Db8     | DT       | 51.11±3.32 | 50.60±1.77  | 93.89±4.12 | 65.75±2.40 | 93.89±4.12  | 8.33±3.93   | 0.585±0.072 |
|         | LR       | 53.89±3.60 | 59.68±9.16  | 22.78±5.69 | 32.88±7.25 | 22.78±5.69  | 85.00±2.48  | 0.626±0.042 |
|         | GLM      | 57.78±1.86 | 65.57±4.98  | 33.33±3.40 | 44.05±2.94 | 33.33±3.40  | 82.22±4.21  | 0.640±0.031 |
|         | NB       | 60.28±3.75 | 65.79±7.44  | 44.44±1.96 | 52.87±2.40 | 44.44±1.96  | 76.11±8.00  | 0.653±0.030 |
|         | RF       | 52.78±1.96 | 51.49±1.06  | 96.11±3.17 | 67.05±1.49 | 96.11±3.17  | 9.44±3.17   | 0.555±0.043 |
|         | GBT      | 66.67±2.41 | 68.15±3.99  | 63.33±6.33 | 65.42±3.16 | 63.33±6.33  | 70.00±6.63  | 0.752±0.023 |
|         | DL       | 65.28±2.60 | 64.08±4.08  | 71.11±8.91 | 67.03±3.30 | 71.11±8.91  | 59.44±9.74  | 0.700±0.014 |
|         | SVM      | 51.39±3.93 | 51.19±3.29  | 65.56±8.47 | 57.28±4.12 | 65.56±8.47  | 37.22±10.13 | 0.517±0.035 |
|         | FLM      | 52.50±2.85 | 55.61±6.19  | 26.67±4.65 | 35.80±4.87 | 26.67±4.65  | 78.33±6.02  | 0.570±0.033 |

### 3. WPD

**Table S6.** Classification performance of the best ML models generated from the WPD-based processing of the ECG signals at a decomposition level of 2.

| Wavelet | ML-model | Level-2    |             |            |            |             |             |             |
|---------|----------|------------|-------------|------------|------------|-------------|-------------|-------------|
|         |          | Accuracy   | Precision   | Recall     | F-measure  | Sensitivity | Specificity | AUC         |
| Db2     | DT       | 50.00±0.00 | 50.00±0.00  | 100.0±0.0  | 50.00±0.0  | 100.0±0.0   | 100.0±0.0   | 0.572±0.037 |
|         | LR       | 59.72±1.96 | 77.39±5.93  | 27.78±3.93 | 40.70±4.37 | 27.78±3.93  | 91.67±3.40  | 0.636±0.068 |
|         | GLM      | 63.61±3.73 | 72.85±7.69  | 43.89±3.04 | 54.70±4.03 | 43.89±3.04  | 83.33±5.56  | 0.687±0.078 |
|         | NB       | 60.00±4.33 | 66.56±7.47  | 40.56±4.21 | 50.35±5.09 | 40.56±4.21  | 79.44±5.41  | 0.622±0.032 |
|         | RF       | 55.00±2.11 | 61.77±6.04  | 27.22±4.12 | 37.57±3.88 | 27.22±4.12  | 82.78±5.34  | 0.607±0.041 |
|         | GBT      | 71.11±4.21 | 69.37±3.76  | 75.56±4.56 | 72.22±4.12 | 75.56±4.56  | 66.67±3.93  | 0.794±0.053 |
|         | DL       | 64.44±3.75 | 69.53±5.06  | 51.67±5.41 | 59.17±4.59 | 51.67±5.41  | 77.22±4.97  | 0.747±0.030 |
|         | SVM      | 48.06±3.20 | 46.72±4.56  | 25.56±6.92 | 32.53±6.70 | 25.56±6.92  | 70.56±9.94  | 0.445±0.031 |
|         | FLM      | 51.39±3.26 | 52.07±4.56  | 42.22±4.56 | 46.43±2.75 | 42.22±4.56  | 60.56±8.87  | 0.547±0.036 |
| Db4     | DT       | 58.06±2.28 | 58.74±2.72  | 54.44±6.09 | 56.37±3.58 | 54.44±6.09  | 61.67±5.34  | 0.592±0.046 |
|         | LR       | 66.11±3.62 | 76.36±4.63  | 47.78±6.63 | 58.33±5.88 | 47.78±6.63  | 84.44±3.17  | 0.695±0.042 |
|         | GLM      | 62.78±5.84 | 67.85±7.26  | 48.33±7.51 | 56.38±7.37 | 48.33±7.51  | 77.22±5.34  | 0.696±0.076 |
|         | NB       | 57.22±3.46 | 60.75±5.56  | 40.56±8.24 | 48.33±6.98 | 40.56±8.24  | 73.89±5.76  | 0.591±0.061 |
|         | RF       | 52.22±0.76 | 57.64±2.95  | 17.22±4.97 | 26.19±5.55 | 17.22±4.97  | 87.22±4.21  | 0.562±0.039 |
|         | GBT      | 69.17±2.67 | 74.92±3.85  | 57.78±4.56 | 65.15±3.58 | 57.78±4.56  | 80.56±3.93  | 0.774±0.032 |
|         | DL       | 64.44±3.49 | 71.54±6.23  | 48.89±6.39 | 57.75±4.90 | 48.89±6.39  | 80.00±7.19  | 0.744±0.035 |
|         | SVM      | 53.06±3.85 | 56.23±7.65  | 27.78±6.51 | 36.94±6.85 | 27.78±6.51  | 78.33±5.34  | 0.526±0.043 |
|         | FLM      | 50.00±0.00 | 50.00±0.00  | 100.0±0.0  | 50.00±0.0  | 100.0±0.0   | 100.0±0.0   | 0.572±0.037 |
| Db6     | DT       | 50.00±0.00 | 50.00±0.00  | 100.0±0.0  | 50.00±0.0  | 100.0±0.0   | 100.0±0.0   | 0.572±0.037 |
|         | LR       | 64.72±2.52 | 80.66±2.92  | 38.89±6.80 | 52.15±6.08 | 38.89±6.80  | 90.56±2.48  | 0.720±0.060 |
|         | GLM      | 63.89±3.26 | 75.81±4.17  | 40.56±5.76 | 52.75±5.79 | 40.56±5.76  | 87.22±1.52  | 0.698±0.046 |
|         | NB       | 57.50±2.52 | 62.63±3.95  | 37.22±5.76 | 46.51±5.03 | 37.22±5.76  | 77.78±3.93  | 0.624±0.047 |
|         | RF       | 50.00±0.00 | 50.00±0.00  | 100.0±0.0  | 50.00±0.0  | 100.0±0.0   | 100.0±0.0   | 0.572±0.037 |
|         | GBT      | 67.78±5.93 | 70.59±7.51  | 61.11±6.51 | 65.45±6.62 | 61.11±6.51  | 74.44±6.63  | 0.715±0.064 |
|         | DL       | 66.39±3.01 | 67.68±3.27  | 62.78±4.21 | 65.10±3.41 | 62.78±4.21  | 70.00±3.62  | 0.750±0.045 |
|         | SVM      | 51.94±5.52 | 52.14±6.17  | 48.33±5.76 | 50.13±5.77 | 48.33±5.76  | 55.56±6.51  | 0.525±0.042 |
|         | FLM      | 51.39±3.26 | 52.07±4.56  | 42.22±4.56 | 46.43±2.75 | 42.22±4.56  | 60.56±8.87  | 0.547±0.036 |
| Db8     | DT       | 50.00±0.98 | 50.00±0.05  | 97.78±2.32 | 66.16±0.82 | 97.78±2.32  | 2.22±2.32   | 0.457±0.020 |
|         | LR       | 62.50±0.00 | 75.61±3.24  | 37.22±3.17 | 49.74±2.11 | 37.22±3.17  | 87.78±3.17  | 0.655±0.058 |
|         | GLM      | 58.61±2.28 | 90.56±10.32 | 19.44±3.93 | 31.83±5.58 | 19.44±3.93  | 97.78±2.32  | 0.682±0.062 |
|         | NB       | 52.22±1.86 | 51.22±1.01  | 92.78±3.17 | 66.00±1.62 | 92.78±3.17  | 11.67±1.24  | 0.508±0.026 |
|         | RF       | 57.22±3.85 | 55.27±2.61  | 75.56±8.19 | 63.73±4.18 | 75.56±8.19  | 38.89±6.80  | 0.578±0.075 |
|         | GBT      | 71.67±1.58 | 67.12±1.35  | 85.00±3.17 | 74.99±1.59 | 85.00±3.17  | 58.33±2.78  | 0.828±0.025 |
|         | DL       | 69.72±2.28 | 66.18±3.17  | 74.44±4.97 | 71.05±2.32 | 74.44±4.97  | 65.00±5.76  | 0.796±0.028 |
|         | SVM      | 61.67±1.58 | 61.41±2.14  | 63.33±4.97 | 62.23±2.23 | 63.33±4.97  | 60.00±5.41  | 0.649±0.026 |
|         | FLM      | 49.44±3.49 | 49.67±2.05  | 85.00±5.05 | 62.68±2.83 | 85.00±5.05  | 13.89±4.39  | 0.498±0.055 |

**Table S7.** Classification performance of the best ML models generated from the WPD-based processing of the ECG signals at a decomposition level of 3.

| Wavelet | ML-model | Level-3    |             |            |            |             |             |             |
|---------|----------|------------|-------------|------------|------------|-------------|-------------|-------------|
|         |          | Accuracy   | Precision   | Recall     | F-measure  | Sensitivity | Specificity | AUC         |
| Db2     | DT       | 55.83±3.17 | 60.86±5.73  | 32.78±4.97 | 42.49±5.20 | 32.78±4.97  | 78.89±4.21  | 0.570±0.031 |
|         | LR       | 63.61±1.52 | 63.68±2.46  | 63.89±4.39 | 63.67±1.83 | 63.89±4.39  | 63.33±5.34  | 0.662±0.007 |
|         | GLM      | 63.89±2.60 | 61.66±2.37  | 73.89±5.41 | 67.13±2.61 | 73.89±5.41  | 53.89±6.09  | 0.715±0.027 |
|         | NB       | 54.17±2.78 | 53.36±2.29  | 66.67±3.40 | 59.25±2.45 | 66.7±3.40   | 41.67±4.39  | 0.578±0.024 |
|         | RF       | 53.33±1.58 | 51.75±0.83  | 98.33±2.48 | 67.81±1.23 | 98.33±2.48  | 8.33±1.96   | 0.583±0.052 |
|         | GBT      | 69.44±1.96 | 88.39±4.35  | 45.00±4.97 | 59.43±4.02 | 45.00±4.97  | 93.89±3.04  | 0.787±0.033 |
|         | DL       | 65.28±2.60 | 62.70±2.69  | 76.11±5.76 | 68.63±2.53 | 76.11±5.76  | 54.44±7.24  | 0.710±0.025 |
|         | SVM      | 53.06±2.48 | 62.41±10.39 | 17.22±2.32 | 26.79±2.88 | 17.22±2.32  | 88.89±5.56  | 0.578±0.063 |
|         | FLM      | 54.17±1.39 | 52.28±0.78  | 95.56±1.52 | 67.58±0.88 | 95.56±1.52  | 12.78±2.48  | 0.583±0.092 |
| Db4     | DT       | NA         | -           | -          | -          | -           | -           | -           |
|         | LR       | 63.33±3.20 | 65.77±3.31  | 55.58±7.61 | 60.05±5.07 | 55.56±7.61  | 71.11±4.21  | 0.675±0.046 |
|         | GLM      | 58.89±3.20 | 57.49±2.85  | 68.89±3.62 | 62.63±2.57 | 68.89±3.62  | 48.89±6.09  | 0.650±0.046 |
|         | NB       | 55.83±2.28 | 55.67±2.63  | 58.89±5.34 | 57.08±2.28 | 58.89±5.34  | 57.78±7.61  | 0.571±0.005 |
|         | RF       | 52.50±2.48 | 51.38±1.38  | 92.78±3.17 | 66.13±1.89 | 92.78±3.17  | 12.22±2.48  | 0.572±0.081 |
|         | GBT      | 67.22±2.88 | 84.19±7.31  | 42.78±5.05 | 56.51±4.69 | 42.78±5.05  | 91.67±4.38  | 0.769±0.048 |
|         | DL       | 57.50±1.24 | 79.22±3.08  | 20.56±4.21 | 32.40±5.31 | 20.56±4.21  | 94.44±1.96  | 0.738±0.048 |
|         | SVM      | NA         | -           | -          | -          | -           | -           | -           |
|         | FLM      | 53.61±2.32 | 52.67±1.73  | 71.11±3.17 | 60.51±2.16 | 71.11±3.19  | 36.11±2.78  | 0.549±0.041 |
| Db6     | DT       | 52.22±3.34 | 53.08±4.80  | 36.67±4.97 | 43.34±5.02 | 36.67±4.97  | 67.78±2.48  | 0.527±0.029 |
|         | LR       | 61.67±2.11 | 78.07±6.45  | 33.33±7.08 | 46.12±6.58 | 33.33±7.08  | 90.00±5.76  | 0.656±0.054 |
|         | GLM      | 60.28±3.75 | 58.00±2.98  | 75.00±2.78 | 65.40±2.83 | 75.00±2.78  | 45.56±5.41  | 0.665±0.063 |
|         | NB       | 53.89±2.67 | 53.48±2.35  | 58.89±7.19 | 55.93±4.20 | 58.89±7.19  | 48.89±5.05  | 0.567±0.020 |
|         | RF       | 51.11±3.60 | 50.96±3.78  | 49.44±6.92 | 50.14±5.37 | 49.44±6.02  | 52.78±1.96  | 0.548±0.048 |
|         | GBT      | 69.44±3.80 | 70.82±5.09  | 66.67±1.96 | 68.63±3.10 | 66.67±1.96  | 72.22±6.51  | 0.786±0.050 |
|         | DL       | 65.28±2.78 | 78.41±5.11  | 42.22±3.62 | 54.84±3.91 | 42.22±3.62  | 88.33±3.04  | 0.735±0.048 |
|         | SVM      | 55.00±2.11 | 52.79±1.19  | 95.00±3.62 | 67.85±1.60 | 95.00±3.62  | 15.00±4.21  | 0.555±0.023 |
|         | FLM      | 50.83±0.76 | 50.43±0.39  | 98.89±1.52 | 66.79±0.28 | 98.89±1.52  | 2.78±2.78   | 0.506±0.090 |
| Db8     | DT       | 55.00±2.11 | 52.79±1.19  | 95.00±3.62 | 67.85±1.60 | 95.00±3.62  | 15.00±4.21  | 0.555±0.023 |
|         | LR       | 61.11±2.60 | 74.77±5.99  | 33.89±6.02 | 46.33±5.81 | 33.89±6.02  | 88.33±4.56  | 0.667±0.060 |
|         | GLM      | 58.89±1.58 | 65.10±4.02  | 38.89±4.39 | 48.50±3.23 | 38.89±4.39  | 78.89±4.65  | 0.619±0.039 |
|         | NB       | 56.67±2.48 | 59.03±3.09  | 43.33±6.30 | 49.82±4.86 | 43.33±6.39  | 70.00±4.12  | 0.592±0.049 |
|         | RF       | 49.41±2.11 | 49.40±1.40  | 72.78±4.56 | 58.84±2.45 | 72.78±4.56  | 25.56±1.24  | 0.451±0.040 |
|         | GBT      | 66.94±4.75 | 65.92±4.67  | 70.56±6.09 | 68.07±4.55 | 70.56±6.09  | 63.33±6.63  | 0.733±0.047 |
|         | DL       | 60.28±3.20 | 57.43±2.35  | 79.44±3.73 | 66.66±2.76 | 79.44±3.73  | 41.11±3.62  | 0.685±0.066 |
|         | SVM      | 48.61±4.05 | 48.82±2.82  | 67.78±9.94 | 56.66±5.30 | 67.78±9.94  | 29.44±4.21  | 0.488±0.074 |
|         | FLM      | 55.00±1.86 | 53.00±1.08  | 88.33±5.34 | 66.21±2.03 | 88.33±5.34  | 21.67±4.56  | 0.585±0.045 |

**Table S8.** Classification performance of the best ML models generated from the WPD-based processing of the ECG signals at a decomposition level of 4.

| Wavelet | ML-model | Level-4    |             |            |            |             |             |             |
|---------|----------|------------|-------------|------------|------------|-------------|-------------|-------------|
|         |          | Accuracy   | Precision   | Recall     | F-measure  | Sensitivity | Specificity | AUC         |
| Db2     | DT       | 53.61±3.34 | 54.48±4.13  | 43.89±5.34 | 48.53±4.52 | 43.89±5.34  | 63.33±4.97  | 0.545±0.045 |
|         | LR       | 63.33±4.24 | 65.03±5.62  | 58.89±3.04 | 61.68±3.17 | 58.89±3.04  | 67.78±8.24  | 0.649±0.050 |
|         | GLM      | 56.94±3.54 | 67.85±10.15 | 27.22±5.34 | 38.58±5.90 | 27.22±5.34  | 86.67±5.34  | 0.652±0.053 |
|         | NB       | 59.17±3.62 | 60.41±3.45  | 52.78±6.51 | 56.26±4.92 | 52.78±6.51  | 65.56±3.17  | 0.036±0.040 |
|         | RF       | 58.06±3.01 | 59.11±3.48  | 52.78±4.39 | 55.68±3.28 | 52.78±4.39  | 63.33±5.34  | 0.592±0.075 |
|         | GBT      | 73.33±1.16 | 73.13±3.02  | 74.44±7.45 | 73.50±2.50 | 74.44±7.45  | 72.27±6.51  | 0.795±0.046 |
|         | DL       | 64.44±2.32 | 76.56±3.91  | 41.67±3.40 | 53.92±3.47 | 41.67±3.40  | 87.22±2.48  | 0.730±0.026 |
|         | SVM      | 57.50±2.11 | 89.44±10.83 | 17.22±3.62 | 28.72±5.16 | 17.22±3.62  | 97.78±2.32  | 0.697±0.054 |
|         | FLM      | 53.06±2.85 | 58.41±7.93  | 21.11±6.39 | 30.68±7.25 | 21.11±6.39  | 85.00±4.21  | 0.586±0.026 |
| Db4     | DT       | NA         | -           | --         | -          | -           | -           | -           |
|         | LR       | 58.89±0.76 | 66.95±2.62  | 35.56±4.12 | 46.26±2.96 | 35.56±4.12  | 82.22±4.21  | 0.645±0.034 |
|         | GLM      | 56.94±2.60 | 63.77±4.72  | 32.22±4.21 | 42.72±4.40 | 32.22±4.21  | 81.67±3.17  | 0.598±0.039 |
|         | NB       | 58.33±0.98 | 58.57±0.75  | 57.22±7.24 | 57.66±3.90 | 57.22±7.24  | 59.44±5.76  | 0.567±0.025 |
|         | RF       | 55.83±3.32 | 54.05±2.39  | 78.33±6.02 | 63.90±3.06 | 78.33±6.02  | 33.33±6.51  | 0.598±0.061 |
|         | GBT      | 66.11±4.24 | 65.77±4.01  | 67.22±6.92 | 66.39±4.78 | 67.22±6.92  | 65.00±5.05  | 0.730±0.027 |
|         | DL       | 62.22±4.85 | 66.97±7.24  | 48.89±5.76 | 56.37±5.60 | 48.89±5.76  | 75.56±7.19  | 0.692±0.061 |
|         | SVM      | NA         | -           | -          | -          | -           | -           | -           |
|         | FLM      | 53.06±3.85 | 51.81±2.29  | 89.44±2.32 | 65.60±2.38 | 89.44±2.32  | 16.67±5.89  | 0.597±0.045 |
| Db6     | DT       | 50.00±2.60 | 49.99±1.87  | 70.00±5.69 | 58.27±3.12 | 70.00±5.69  | 30.00±3.62  | 0.486±0.050 |
|         | LR       | 57.22±5.14 | 68.99±12.89 | 25.56±6.63 | 37.24±8.89 | 25.56±6.63  | 88.89±3.93  | 0.658±0.065 |
|         | GLM      | 58.61±6.01 | 66.32±9.90  | 33.89±8.65 | 44.74±9.71 | 33.89±8.65  | 83.33±3.93  | 0.659±0.061 |
|         | NB       | 59.27±2.60 | 59.57±2.40  | 60.56±6.02 | 59.96±3.59 | 60.56±6.02  | 58.89±4.56  | 0.621±0.044 |
|         | RF       | 54.72±4.56 | 50.07±5.68  | 45.56±8.91 | 49.89±6.02 | 45.56±8.91  | 83.89±9.00  | 0.564±0.053 |
|         | GBT      | 68.61±3.75 | 76.72±7.07  | 53.89±2.48 | 63.25±3.69 | 53.89±2.48  | 83.33±5.89  | 0.724±0.052 |
|         | DL       | 58.89±5.34 | 60.07±6.73  | 54.44±5.05 | 57.01±4.99 | 54.44±5.05  | 63.33±8.43  | 0.632±0.047 |
|         | SVM      | 51.94±2.71 | 51.48±2.05  | 68.33±4.21 | 58.69±2.50 | 68.33±4.21  | 35.56±4.56  | 0.542±0.045 |
|         | FLM      | 58.06±3.98 | 55.93±3.10  | 77.22±4.97 | 64.80±2.97 | 77.22±4.97  | 38.89±8.10  | 0.605±0.043 |
| Db8     | DT       | NA         | -           | -          | -          | -           | -           | -           |
|         | LR       | 54.17±2.20 | 53.57±1.87  | 61.67±9.09 | 57.13±4.48 | 61.67±9.09  | 46.67±6.92  | 0.577±0.042 |
|         | GLM      | 55.83±1.52 | 57.59±1.97  | 44.44±5.20 | 50.03±3.49 | 44.44±5.20  | 67.22±4.50  | 0.599±0.019 |
|         | NB       | 57.50±2.32 | 57.55±2.30  | 57.78±6.02 | 57.51±3.26 | 57.78±6.02  | 57.22±6.39  | 0.594±0.022 |
|         | RF       | 50.28±4.85 | 50.22±3.40  | 71.67±4.56 | 59.05±3.83 | 71.67±4.56  | 28.89±5.76  | 0.522±0.049 |
|         | GBT      | 62.22±2.28 | 59.47±1.99  | 77.22±3.04 | 67.15±1.65 | 77.22±3.04  | 47.22±5.20  | 59.47±1.99  |
|         | DL       | 57.78±2.32 | 63.16±3.64  | 37.22±3.73 | 46.80±3.74 | 37.22±3.73  | 78.33±2.32  | 0.635±0.023 |
|         | SVM      | 53.33±1.58 | 51.77±0.85  | 98.33±1.52 | 67.82±0.84 | 98.33±1.52  | 8.33±3.40   | 0.631±0.040 |
|         | FLM      | 50.00±0.00 | 50.03±3.45  | 25.00±3.93 | 33.22±3.79 | 25.00±3.93  | 75.00±3.93  | 0.571±0.029 |

**Table S9.** Classification performance of the best ML models generated from the WPD-based processing of the ECG signals at a decomposition level of 5

| Wavelet | ML-model | Level-5  |           |        |           |             |             |     |
|---------|----------|----------|-----------|--------|-----------|-------------|-------------|-----|
|         |          | Accuracy | Precision | Recall | F-measure | Sensitivity | Specificity | AUC |



|     |     |            |             |             |            |             |            |             |
|-----|-----|------------|-------------|-------------|------------|-------------|------------|-------------|
| Db2 | DT  | 52.56±3.60 | 52.78±3.89  | 50.0±5.59   | 51.21±3.89 | 50.00±5.56  | 55.00±7.71 | 0.553±0.046 |
|     | LR  | 56.11±2.11 | 68.40±8.28  | 23.33±3.17  | 34.64±3.64 | 23.33±3.17  | 88.89±3.93 | 0.604±0.022 |
|     | GLM | 57.22±3.01 | 64.62±7.35  | 32.78±4.12  | 43.32±4.13 | 32.78±4.12  | 81.67±5.41 | 0.637±0.058 |
|     | NB  | 61.11±2.95 | 62.13±2.89  | 56.67±5.05  | 59.23±3.93 | 56.67±5.05  | 65.56±2.48 | 0.645±0.037 |
|     | RF  | 58.89±2.88 | 58.68±2.76  | 60.00±5.76  | 59.26±3.67 | 60.00±5.76  | 57.78±4.12 | 0.611±0.019 |
|     | GBT | 63.61±2.48 | 67.50±4.60  | 53.33±4.12  | 59.41±2.53 | 53.33±4.12  | 73.89±6.39 | 0.698±0.032 |
|     | DL  | 62.50±3.62 | 62.28±3.97  | 60.00±6.39  | 61.44±4.30 | 60.00±6.39  | 65.00±6.39 | 0.676±0.041 |
|     | SVM | NA         | -           | -           | -          | -           | -          | -           |
|     | FLM | 58.33±0.98 | 56.26±0.74  | 75.00±4.39  | 64.25±1.66 | 75.00±4.39  | 41.67±3.93 | 0.621±0.026 |
| Db4 | DT  | 50.00±0.00 | 50.00±0.00  | 100.00±0.00 | 66.67±0.00 | 100.00±0.00 | 0.00±0.00  | 0.421±0.058 |
|     | LR  | 58.61±3.85 | 59.71±5.45  | 55.56±3.93  | 57.33±2.30 | 55.56±3.93  | 61.67±9.90 | 0.596±0.037 |
|     | GLM | 60.56±2.11 | 59.56±2.19  | 66.11±2.32  | 62.63±1.68 | 66.11±2.32  | 55.00±4.12 | 0.653±0.019 |
|     | NB  | 59.72±2.41 | 59.62±2.59  | 60.58±4.12  | 60.02±2.63 | 60.56±4.12  | 58.89±4.56 | 0.623±0.044 |
|     | RF  | 51.39±0.98 | 50.72±0.51  | 97.78±2.32  | 66.79±0.69 | 97.78±2.32  | 5.00±3.04  | 0.542±0.020 |
|     | GBT | 57.22±1.16 | 55.29±0.84  | 75.56±3.04  | 63.83±1.33 | 75.56±3.04  | 38.89±2.78 | 0.648±0.019 |
|     | DL  | 64.17±3.85 | 64.12±4.01  | 64.44±3.62  | 64.27±3.74 | 64.44±3.62  | 63.89±4.39 | 0.679±0.050 |
|     | SVM | NA         |             |             |            |             |            |             |
|     | FLM | 56.67±1.16 | 55.28±1.00  | 70.00±2.32  | 61.76±1.05 | 70.00±2.32  | 43.33±3.17 | 0.606±0.037 |
| Db6 | DT  | 46.67±2.32 | 47.94±1.45  | 78.33±4.12  | 59.47±2.24 | 78.33±4.12  | 15.00±2.48 | 0.489±0.024 |
|     | LR  | 54.72±2.11 | 65.61±4.33  | 19.44±5.89  | 29.70±7.19 | 19.44±5.89  | 90.00±2.48 | 0.604±0.024 |
|     | GLM | 55.28±4.75 | 68.32±15.41 | 21.67±6.02  | 32.42±7.95 | 21.67±6.02  | 88.89±7.08 | 0.616±0.041 |
|     | NB  | 60.00±4.21 | 60.40±3.95  | 57.22±8.24  | 58.66±6.00 | 57.22±8.24  | 62.78±3.17 | 0.623±0.032 |
|     | RF  | 50.56±1.24 | 50.37±0.76  | 82.22±3.73  | 62.43±0.62 | 82.22±3.73  | 18.89±6.02 | 0.545±0.035 |
|     | GBT | 61.39±4.33 | 70.25±9.33  | 40.56±3.17  | 51.28±4.35 | 40.56±3.17  | 82.22±7.24 | 0.696±0.064 |
|     | DL  | 54.17±4.71 | 54.14±4.43  | 56.67±6.09  | 55.24±4.32 | 56.67±6.09  | 51.67±8.47 | 0.589±0.059 |
|     | SVM | NA         |             |             |            |             |            |             |
|     | FLM | 57.78±3.62 | 58.42±4.14  | 54.44±6.39  | 56.21±4.59 | 54.44±6.39  | 61.11±6.51 | 0.623±0.063 |
| Db8 | DT  | 53.33±6.10 | 53.19±5.95  | 52.22±9.50  | 52.59±7.65 | 52.22±9.50  | 54.44±6.09 | 0.545±0.067 |
|     | LR  | 54.72±2.11 | 54.16±1.91  | 61.67±6.33  | 57.55±3.23 | 61.67±6.33  | 47.78±6.02 | 0.562±0.045 |
|     | GLM | 55.00±1.86 | 51.64±1.29  | 73.89±5.41  | 62.00±2.34 | 73.89±5.41  | 36.11±5.20 | 0.615±0.023 |
|     | NB  | 60.00±1.81 | 60.59±1.48  | 57.22±6.69  | 58.70±3.81 | 57.22±6.69  | 67.78±4.65 | 0.636±0.034 |
|     | RF  | 54.44±1.52 | 52.53±0.87  | 92.22±4.12  | 66.91±1.48 | 92.22±4.12  | 16.67±3.93 | 0.577±0.077 |
|     | GBT | 60.28±3.04 | 59.30±3.48  | 67.22±3.62  | 62.67±1.50 | 67.22±3.62  | 53.33±8.65 | 0.664±0.026 |
|     | DL  | 63.06±3.34 | 66.29±2.54  | 52.78±9.42  | 58.48±6.44 | 52.78±9.42  | 73.33±3.73 | 0.650±0.054 |
|     | SVM | 48.89±2.06 | 33.33±0.00  | 2.22±4.97   | 4.17±0.00  | 2.22±4.97   | 95.56±3.73 | 0.554±0.095 |
|     | FLM | 57.78±2.52 | 55.36±1.97  | 81.11±3.62  | 65.76±1.78 | 81.11±3.62  | 34.44±5.76 | 0.590±0.055 |

#### 4. Performance with all feature

**Table S10:** Classification performance of the best two ML models, after feeding all extracted features in each decomposition method individually and simultaneously.

|     |     | Accuracy | Precision | Recall   | F-measure | Sensitivity | Specificity | AUC         |
|-----|-----|----------|-----------|----------|-----------|-------------|-------------|-------------|
| EMD | NB  | 50.8±4.3 | 50.8±3.7  | 57.8±5.3 | 54.0±3.7  | 57.8±5.3    | 43.9±8.0    | 0.527±0.038 |
|     | GLM | 53.6±2.1 | 52.8±1.5  | 67.8±5.0 | 59.3±2.7  | 67.8±5.0    | 39.4±3.6    | 0.573±0.021 |
|     | LR  | 52.8±2.0 | 51.5±1.0  | 93.3±4.2 | 66.4±1.8  | 93.3±4.2    | 12.2±3.2    | 0.524±0.044 |
|     | FLM | 47.5±2.1 | 48.5±1.3  | 80.6±4.4 | 60.5±2.2  | 80.6±4.4    | 14.4±1.2    | 0.497±0.051 |
|     | DL  | 56.9±2.2 | 57.2±2.9  | 56.7±4.6 | 56.8±2.2  | 56.7±4.6    | 57.2±6.7    | 0.576±0.038 |

|             |     |            |           |           |          |           |           |             |
|-------------|-----|------------|-----------|-----------|----------|-----------|-----------|-------------|
|             | DT  | 51.4±1.4   | —         | 3.9±3.2   | —        | 3.9±3.2   | 98.9±1.5  | 0.514±0.014 |
|             | RF  | 49.7±1.8   | 48.2±5.7  | 13.3±7.2  | 20.2±9.2 | 13.3±7.2  | 86.1±6.2  | 0.586±0.081 |
|             | GBT | 51.1±2.7   | 52.9±7.0  | 20.0±3.6  | 29.0±4.6 | 20.0±3.6  | 82.2±3.2  | 0.585±0.039 |
|             | SVM | 50.00±0.0  | 50.0±0.0  | 100.0±0.0 | 66.7±0.0 | 100.0±0.0 | 0.0±0.0   | 0.500±0.000 |
|             |     |            |           |           |          |           |           |             |
| DWT         | NB  | 58.3±1.7   | 57.8±1.6  | 61.7±5.3  | 59.6±2.7 | 61.7±5.3  | 55.0±4.6  | 0.612±0.019 |
|             | GLM | 63.9±2.0   | 77.7±5.9  | 39.4±3.6  | 52.1±3.1 | 39.4±3.6  | 88.3±4.6  | 0.727±0.04  |
|             | LR  | 50.0±0.0   | —         | 0.0±0.0   | —        | 0.0±0.0   | 100.0±0.0 | 0.500±0.00  |
|             | FLM | 62.8±2.7   | 61.9±2.5  | 66.7±5.6  | 64.1±3.2 | 66.7±5.6  | 58.9±4.6  | 0.656±0.055 |
|             | DL  | 70.6±2.7   | 69.6±3.4  | 73.3±1.5  | 71.4±2.0 | 73.3±1.5  | 67.8±5.0  | 0.800±0.035 |
|             | DT  | 54.4±3.6   | 54.1±3.5  | 58.3±7.1  | 56.0±4.3 | 58.3±7.1  | 50.6±6.6  | 0.588±0.063 |
|             | RF  | 57.2±2.7   | 55.1±2.0  | 78.3±3.6  | 64.7±2.3 | 78.3±3.6  | 36.1±4.4  | 0.627±0.024 |
|             | GBT | 76.9±2.7   | 84.5±2.6  | 66.1±6.0  | 74.0±3.8 | 66.1±6.0  | 87.8±2.5  | 0.859±0.041 |
|             | SVM | 50.0±0.0   | —         | 0.0±0.0   | —        | 0.0±0.0   | 100.0±0.0 | 0.638±0.036 |
|             |     |            |           |           |          |           |           |             |
| WPD         | NB  | 60.6±3.2   | 62.1±4.1  | 55.0±5.3  | 58.2±3.4 | 55.0±5.3  | 66.1±7.2  | 0.611±0.046 |
|             | GLM | 61.4±2.5   | 74.4±8.6  | 36.1±3.4  | 48.3±2.2 | 36.1      | 86.7±7.2  | 0.671±0.056 |
|             | LR  | 50.0±0.0   | 50.0±0.0  | 100.0±0.0 | 66.7±0.0 | 100.0±0.0 | 0.0±0.0   | 0.543±0.075 |
|             | FLM | 56.4±2.9   | 66.8±9.2  | 26.1±6.1  | 37.2±6.7 | 26.1±6.1  | 86.7±5.3  | 0.648±0.041 |
|             | DL  | 68.3±6.1   | 69.5±6.9  | 65.6±5.4  | 67.5±6.1 | 65.6±5.4  | 71.1±7.0  | 0.759±0.049 |
|             | DT  | 52.2±3.2   | 51.3±1.9  | 87.2±3.2  | 64.6±2.2 | 87.2±3.2  | 17.2±4.6  | 0.604±0.056 |
|             | RF  | 54.4±2.7   | 52.5±1.6  | 95.0±3.6  | 67.6±1.4 | 95.0±3.6  | 13.9±7.1  | 0.658±0.054 |
|             | GBT | 66.9±3.6   | 68.7±3.9  | 62.8±9.3  | 65.3±5.2 | 62.8±9.3  | 71.1±6.4  | 0.767±0.043 |
|             | SVM | 50.00±0.00 | —         | 0.0±0.0   | —        | 0.0±0.0   | 100.0±0.0 | 0.500±0.00  |
|             |     |            |           |           |          |           |           |             |
| EMD+DWT+WPD | NB  | 61.4±3.5   | 63.3±4.3  | 54.4±7.5  | 58.3±5.2 | 54.4±7.5  | 68.3±5.4  | 0.613±0.03  |
|             | GLM | 61.1±2.6   | 79.3±12.3 | 31.1±3.6  | 44.4±3.7 | 31.1±3.6  | 91.1±5.3  | 0.679±0.058 |
|             | LR  | 50.0±0.0   | —         | 0.0±0.0   | —        | 0.0±0.0   | 100.0±0.0 | 0.500±0.000 |
|             | FLM | 61.7±0.8   | 58.7±0.4  | 78.9±3.7  | 67.3±1.4 | 78.9±3.7  | 44.4±2.8  | 0.654±0.026 |
|             | DL  | 68.9±2.9   | 71.1±3.5  | 63.9±5.9  | 67.2±3.7 | 63.9±5.9  | 73.9±4.6  | 0.775±0.027 |
|             | DT  | 56.9±1.7   | 56.2±1.8  | 63.3±6.0  | 59.4±2.7 | 63.3±6.0  | 50.6±6.6  | 0.597±0.050 |
|             | RF  | 57.2±3.7   | 60.6±5.1  | 41.1±6.0  | 48.9±5.6 | 41.1±6.0  | 73.3±4.2  | 0.601±0.070 |
|             | GBT | 69.7±4.9   | 66.3±3.9  | 80.0±6.6  | 72.5±4.8 | 80.0±6.6  | 59.4±4.6  | 0.790±0.045 |
|             | SVM | 50.0±0.0   | 50.0±0.0  | 100.0±0.0 | 66.7±0.0 | 100.0±0.0 | 0.0±0.0   | 0.500±0.00  |
